# Supplementary material
Source: PubMed Central journal article supplement (PMC9930444)
Supplement: NIHMS1865716-supplement-Table_1-2.pdf [file NIHMS1865716-supplement-Table_1-2.pdf]

---

## Data collection and processing

|                                                     | Docking    | Half-domed | Three-Quartered | Tethered   | Released |
|-----------------------------------------------------|------------|------------|-----------------|------------|----------|
| Magnification                                       | 39,000     | 39,000     | 39,000          | 39,000     | 53,000   |
| Voltage (kV)                                        | 200        | 200        | 200             | 200        | 300      |
| Electron exposure (e <sup>-</sup> /Å <sup>2</sup> ) | 90         | 90         | 90              | 90         | 120      |
| Defocus range (μm)                                  | -3 to -5.5 | -3 to -5.5 | -3 to -5.5      | -3 to -5.5 | -2 to -4 |
| Pixel size (Å)                                      | 3.54       | 3.54       | 3.54            | 3.54       | 2.72     |
| Symmetry imposed                                    | C5         | C5         | C5              | C5         | lcos     |
| Particle images                                     | 197        | 322        | 172             | 364        | 567      |
| Map resolution @0.143 FSC (Å)                       | 43.7       | 23.5       | 19.4            | 13.3       | 8.3      |

---

**Table S1. Cryo-ET data analysis and subtomogram averaging statistics.**

---

| Helical tube environment                               | N  | Avg. Diameter (nm) |
|--------------------------------------------------------|----|--------------------|
| Thin extension, neighboring budding particles with NCs | 10 | 55.3 +/- 8.5       |
| Thin extension, spike array, no neighboring NCs        | 12 | 65.4 +/- 4.0       |
| Base of budding intermediate particle with NC          | 2  | 58.7 +/- 1.6       |

---

Note: diameter of virion approx. 70nm

**Table S2. Average diameters of helical tubes formed by hexagonal spike arrays in different cellular contexts.**
